# Supplementary material for: Corneal Sensitivity to Hyperosmolar Eye Drops: A Novel Behavioral Assay to Assess Diabetic Peripheral Neuropathy
Source: PubMed Central journal article supplement (PMC5113984; doi:10.1167/iovs.16-19435), 2016-05-04
Supplement: i1552-5783-57-6-2412-s01.pdf [file i1552-5783-57-6-2412-s01.pdf]

Figure 1 Supplemental

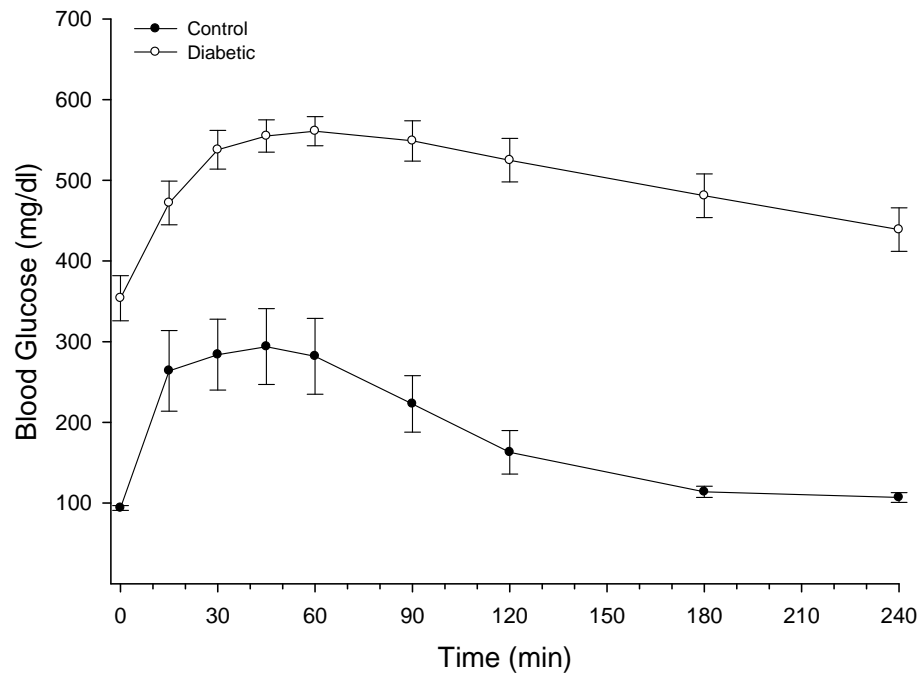

Figure 1 supplemental. Effect of type 2 diabetes induced by high fat diet and low dose streptozotocin in Sprague-Dawley rats on glucose tolerance. Glucose clearance was determined as described in the Methods section. Data are presented as the mean  $\pm$  S.E.M. for glucose utilization in mg/dl. The number of rats in each group was from 12-15.
